# Supplementary material for: Having a Happy Spouse Is Associated With Lowered Risk of Mortality
Source: PubMed Central journal article supplement — Psychol Sci. 2019 Mar 21;30(5):798–803. doi: 10.1177/0956797619835147 (PMC6512053; doi:10.1177/0956797619835147), 2019-03-21
Supplement: StavrovaSupplementalMaterial_rev.pdf [file StavrovaSupplementalMaterial_rev.pdf]

## Supplementary Online Materials

Table S1

*Means, standard deviations and correlations among the variables*

|                               | <i>M</i> | <i>SD</i> | 1       | 2       | 3       | 4       | 5       | 6       | 7      | 8      | 9       | 10      | 11      | 12   | 13      | 14      | 15     | 16     | 17 | 18 |
|-------------------------------|----------|-----------|---------|---------|---------|---------|---------|---------|--------|--------|---------|---------|---------|------|---------|---------|--------|--------|----|----|
| 1 Vital status                | 0.17     | 0.37      | -       | -       | -       | -       | -       | -       | -      | -      | -       | -       | -       | -    | -       | -       | -      | -      | -  | -  |
| 2 Life satisfaction: actor    | 7.28     | 2.14      | -.07*** | -       | -       | -       | -       | -       | -      | -      | -       | -       | -       | -    | -       | -       | -      | -      | -  | -  |
| 3 Life satisfaction: partner  | 7.28     | 2.14      | -.06*** | .37***  | -       | -       | -       | -       | -      | -      | -       | -       | -       | -    | -       | -       | -      | -      | -  | -  |
| 4 Gender: actor               | 0.50     | 0.50      | .15***  | -.02    | .02     | -       | -       | -       | -      | -      | -       | -       | -       | -    | -       | -       | -      | -      | -  | -  |
| 5 Age: actor                  | 67.19    | 9.75      | .34***  | .08***  | .09***  | .17***  | -       | -       | -      | -      | -       | -       | -       | -    | -       | -       | -      | -      | -  | -  |
| 6 Age: partner                | 67.19    | 9.75      | .26***  | .09***  | .08***  | -.17*** | .78***  | -       | -      | -      | -       | -       | -       | -    | -       | -       | -      | -      | -  | -  |
| 7 Ethnicity: actor            | 0.87     | 0.34      | .000    | .10***  | .10***  | -.003   | .11***  | .10***  | -      | -      | -       | -       | -       | -    | -       | -       | -      | -      | -  | -  |
| 8 Ethnicity: partner          | 0.87     | 0.34      | .004    | .10***  | .10***  | .003    | .10***  | .11***  | .81*** | -      | -       | -       | -       | -    | -       | -       | -      | -      | -  | -  |
| 9 Education: actor            | 3.33     | 1.34      | -.12*** | .12***  | .11***  | .005    | -.12*** | -.11*** | .14*** | .13*** | -       | -       | -       | -    | -       | -       | -      | -      | -  | -  |
| 10 Education: partner         | 3.33     | 1.34      | -.11*** | .11***  | .12***  | -.005   | -.11*** | -.12*** | .13*** | .14*** | .53***  | -       | -       | -    | -       | -       | -      | -      | -  | -  |
| 11 Household income           | 10.89    | 0.93      | -.14*** | .11***  | .11***  | n/a     | -.20*** | -.20*** | .14*** | .14*** | .40***  | .40***  | -       | -    | -       | -       | -      | -      | -  | -  |
| 12 Same-sex couple            | .005     | .07       | -.003   | .01     | .01     | -.01    | -.04*** | -.04*** | .02    | .02    | .04***  | .04***  | .02     | -    | -       | -       | -      | -      | -  | -  |
| 13 Morbidity: actor           | 2.21     | 1.52      | .23***  | -.16*** | -.07*** | -.01    | .30***  | .26***  | .01    | .01    | -.15*** | -.15*** | -.17*** | -.02 | -       | -       | -      | -      | -  | -  |
| 14 Morbidity: partner         | 2.21     | 1.52      | .12***  | -.07*** | -.16*** | .01     | .26***  | .30***  | .01    | .01    | -.15*** | -.15*** | -.17*** | -.02 | .22***  | -       | -      | -      | -  | -  |
| 15 Self-rated health: actor   | 3.26     | 1.07      | -.26*** | .31***  | .18***  | -.05*** | -.14*** | -.11*** | .12*** | .11*** | .30***  | .27***  | .28***  | .02* | -.45*** | -.13*** | -      | -      | -  | -  |
| 16 Self-rated health: partner | 3.26     | 1.07      | -.09*** | .18***  | .31***  | .05***  | -.11*** | -.14*** | .11*** | .12*** | .27***  | .30***  | .28***  | .02* | -.13*** | -.45*** | .25*** | -      | -  | -  |
| 17 Perceived partner support  | 3.27     | 0.55      | -.01    | .37***  | .27***  | .14***  | .07***  | .01     | .10*** | .10*** | .09***  | .13***  | .10***  | .03* | -.08*** | -.07*** | .12*** | .16*** | -  | -  |

|    |                            |      |      |         |        |        |         |         |         |        |        |        |        |        |      |         |         |        |        |        |        |
|----|----------------------------|------|------|---------|--------|--------|---------|---------|---------|--------|--------|--------|--------|--------|------|---------|---------|--------|--------|--------|--------|
| 18 | Physical activity: actor   | 2.69 | 1.09 | -.19*** | .17*** | .10*** | .11***  | -.12*** | -.13*** | .05*** | .06*** | .20*** | .20*** | .18*** | .02* | -.26*** | -.12*** | .35*** | .17*** | .08*** | -      |
| 19 | Physical activity: partner | 2.69 | 1.09 | -.12*** | .10*** | .17*** | -.10*** | -.13*** | -.12*** | .06*** | .05*** | .20*** | .20*** | .18*** | .02* | -.12*** | -.26*** | .17*** | .35*** | .09*** | .24*** |

*Note.* \*\*\* $p < .001$ , \*\* $p < .01$ , \* $p < .05$ . Vital status: 1=dead, 0=alive; Gender: 1=male, 0=female; Ethnicity: 1=Caucasian, 0=other; Same-sex couple: 1 = yes, 0 = no.

Table S2

*Dyadic survival analysis (Cox proportional hazard models) predicting mortality*

| Predictor                  | Model 1<br>(n=8,748) |              | Model 2<br>(n=8,748) |              | Model 3<br>(n=8,590) |              | Model 4<br>(n=8,578) |              |
|----------------------------|----------------------|--------------|----------------------|--------------|----------------------|--------------|----------------------|--------------|
|                            | HR                   | 95% CI       |
| Life satisfaction          |                      |              |                      |              |                      |              |                      |              |
| Life satisfaction: partner | 0.87***              | [0.83; 0.91] | 0.92**               | [0.87; 0.97] | 0.90***              | [0.85; 0.95] | 0.92**               | [0.87; 0.97] |
| Life satisfaction: actor   | -                    | -            | 0.86***              | [0.82; 0.91] | 0.82***              | [0.78; 0.86] | 0.96                 | [0.90; 1.02] |
| Socio-demographics         |                      |              |                      |              |                      |              |                      |              |
| Baseline year              | -                    | -            | -                    | -            | 0.91                 | [0.81; 1.02] | 0.91                 | [0.81; 1.01] |
| Gender: actor              | -                    | -            | -                    | -            | 1.81***              | [1.60; 2.06] | 1.90***              | [1.66; 2.18] |
| Age: actor                 | -                    | -            | -                    | -            | 2.26***              | [2.04; 2.51] | 2.13***              | [1.91; 2.37] |
| Age: partner               | -                    | -            | -                    | -            | 1.11*                | [1.01; 1.23] | 1.05                 | [0.95; 1.17] |
| Ethnicity: actor           | -                    | -            | -                    | -            | 0.86                 | [0.64; 1.16] | 0.91                 | [0.67; 1.25] |
| Ethnicity: partner         | -                    | -            | -                    | -            | 1.10                 | [0.82; 1.49] | 1.11                 | [0.80; 1.52] |
| Education: actor           | -                    | -            | -                    | -            | 0.91***              | [0.87; 0.95] | 0.96                 | [0.92; 1.00] |
| Education: partner         | -                    | -            | -                    | -            | 0.96                 | [0.92; 1.01] | 1.00                 | [0.96; 1.05] |
| Household income           | -                    | -            | -                    | -            | 0.93*                | [0.87; 0.99] | 0.96                 | [0.90; 1.01] |
| Same-sex couple            | -                    | -            | -                    | -            | 2.72*                | [1.19; 6.22] | 2.97**               | [1.38; 6.40] |
| Health indicators          |                      |              |                      |              |                      |              |                      |              |
| Morbidity: actor           | -                    | -            | -                    | -            | -                    | -            | 1.20***              | [1.13; 1.27] |

|                            |   |   |   |   |   |   |         |              |
|----------------------------|---|---|---|---|---|---|---------|--------------|
| Morbidity: partner         | - | - | - | - | - | - | 1.01    | [0.95; 1.07] |
| Self-rated health: actor   | - | - | - | - | - | - | 0.62*** | [0.58; 0.66] |
| Self-rated health: partner | - | - | - | - | - | - | 1.06    | [1.00; 1.13] |
| Mortality: partner         | - | - | - | - | - | - | 1.38*** | [1.15; 1.65] |

*Note.* \*  $p < .05$ , \*\*  $p < .01$ , \*\*\*  $p \leq .001$ . Subsample: 1=2008, 0=2006; Gender: 1=male, 0=female; Ethnicity: 1=Caucasian, 0=other; Same-sex couple: 1 = yes, 0 = no; Mortality (partner): 1 = deceased, 0 = alive. All models were estimated using the robust sandwich variance estimators in the *survival* package (Therneau, 2015) in R.

Table S3

*Dyadic survival analysis (Cox proportional hazard models) predicting mortality (with z-standardized life satisfaction)*

| Predictor                  | Model 1<br>(n=8,748) |              | Model 2<br>(n=8,748) |              | Model 3<br>(n=8,590) |              | Model 4<br>(n=8,578) |              |
|----------------------------|----------------------|--------------|----------------------|--------------|----------------------|--------------|----------------------|--------------|
|                            | HR                   | 95% CI       |
| Life satisfaction          |                      |              |                      |              |                      |              |                      |              |
| Life satisfaction: partner | 0.87***              | [0.83; 0.91] | 0.92**               | [0.87; 0.97] | 0.90***              | [0.85; 0.95] | 0.92**               | [0.87; 0.97] |
| Life satisfaction: actor   | -                    | -            | 0.86***              | [0.82; 0.91] | 0.82***              | [0.78; 0.87] | 0.96                 | [0.90; 1.02] |
| Socio-demographics         |                      |              |                      |              |                      |              |                      |              |
| Baseline year              | -                    | -            | -                    | -            | 0.92                 | [0.84; 1.04] | 0.91                 | [0.81; 1.02] |
| Gender: actor              | -                    | -            | -                    | -            | 1.81***              | [1.60; 2.06] | 1.90***              | [1.66; 2.18] |
| Age: actor                 | -                    | -            | -                    | -            | 2.26***              | [2.04; 2.51] | 2.13***              | [1.92; 2.38] |
| Age: partner               | -                    | -            | -                    | -            | 1.11*                | [1.01; 1.23] | 1.05                 | [0.95; 1.17] |
| Ethnicity: actor           | -                    | -            | -                    | -            | 0.86                 | [0.64; 1.16] | 0.91                 | [0.67; 1.25] |
| Ethnicity: partner         | -                    | -            | -                    | -            | 1.11                 | [0.82; 1.49] | 1.11                 | [0.80; 1.52] |
| Education: actor           | -                    | -            | -                    | -            | 0.91***              | [0.87; 0.95] | 0.96                 | [0.92; 1.00] |
| Education: partner         | -                    | -            | -                    | -            | 0.96                 | [0.92; 1.01] | 1.00                 | [0.96; 1.05] |
| Household income           | -                    | -            | -                    | -            | 0.93*                | [0.87; 0.99] | 0.96                 | [0.90; 1.01] |
| Same-sex couple            | -                    | -            | -                    | -            | 2.72*                | [1.19; 6.26] | 2.97**               | [1.38; 6.40] |
| Health indicators          |                      |              |                      |              |                      |              |                      |              |
| Morbidity: actor           | -                    | -            | -                    | -            | -                    | -            | 1.20***              | [1.13; 1.27] |
| Morbidity: partner         | -                    | -            | -                    | -            | -                    | -            | 1.01                 | [0.95; 1.07] |
| Self-rated health: actor   | -                    | -            | -                    | -            | -                    | -            | 0.62***              | [0.58; 0.66] |

|                            |   |   |   |   |   |   |         |              |
|----------------------------|---|---|---|---|---|---|---------|--------------|
| Self-rated health: partner | - | - | - | - | - | - | 1.06    | [1.00; 1.13] |
| Mortality: partner         | - | - | - | - | - | - | 1.38*** | [1.15; 1.65] |

*Note.* \*  $p < .05$ , \*\*  $p < .01$ , \*\*\*  $p \leq .001$ . Subsample: 1=2008, 0=2006; Gender: 1=male, 0=female; Ethnicity: 1=Caucasian, 0=other; Same-sex couple: 1 = yes, 0 = no; Mortality (partner): 1 = deceased, 0 = alive. All models were estimated using the robust sandwich variance estimators in the *survival* package (Therneau, 2015) in R.

Table S4

*Dyadic survival analysis predicting mortality. Robustness checks*

| Predictor                  | Model 1: only married individuals;<br>n=8,228 |               | Model 2: age<br>as time scale |              | Model 3: frailty model |      |
|----------------------------|-----------------------------------------------|---------------|-------------------------------|--------------|------------------------|------|
|                            | HR                                            | 95%CI         | HR                            | 95%CI        | HR                     | SE   |
| Life satisfaction          |                                               |               |                               |              |                        |      |
| Life satisfaction: partner | 0.92**                                        | [0.87; 0.98]  | 0.90***                       | [0.85; 0.96] | 0.92**                 | 0.03 |
| Life satisfaction: actor   | 0.95                                          | [0.90; 1.01]  | 0.93*                         | [0.88; 0.99] | 0.96                   | 0.03 |
| Socio-demographics         |                                               |               |                               |              |                        |      |
| Baseline year              | 0.88*                                         | [0.78; 0.99]  | 0.79***                       | [0.70; 0.88] | 0.89                   | 0.06 |
| Gender: actor              | 1.88***                                       | [1.63; 2.16]  | 1.39***                       | [1.24; 1.55] | 1.90***                | 0.07 |
| Age: actor                 | 2.13***                                       | [1.91; 2.38]  | -                             | -            | 2.12***                | 0.05 |
| Age: partner               | 1.05                                          | [0.94; 1.17]  | -                             | -            | 1.05                   | 0.05 |
| Ethnicity: actor           | 0.88                                          | [0.64; 1.21]  | 0.70                          | [0.49; 1.01] | 0.91                   | 0.15 |
| Ethnicity: partner         | 1.16                                          | [0.84; 1.60]  | 1.15                          | [0.79; 1.67] | 1.11                   | 0.15 |
| Education: actor           | 0.96                                          | [0.92; 1.00]  | 0.98                          | [0.94; 1.02] | 0.96                   | 0.02 |
| Education: partner         | 1.02                                          | [0.97; 1.07]  | 0.98                          | [0.94; 1.02] | 1.00                   | 0.02 |
| Household income           | 0.95                                          | [0.90; 1.01]  | 1.02                          | [0.94; 1.11] | 0.96                   | 0.03 |
| Same-sex couple            | 15.76***                                      | [4.38; 56.76] | 3.81**                        | [1.67; 8.68] | 2.96**                 | 0.41 |
| Health indicators          |                                               |               |                               |              |                        |      |
| Morbidity: actor           | 1.21***                                       | [1.14; 1.28]  | 1.14***                       | [1.07; 1.20] | 1.20***                | 0.03 |

|                            |         |              |         |              |         |      |
|----------------------------|---------|--------------|---------|--------------|---------|------|
| Morbidity: partner         | 1.01    | [0.95; 1.07] | 0.98    | [0.93; 1.04] | 1.01    | 0.03 |
| Self-rated health: actor   | 0.62*** | [0.58; 0.67] | 0.68*** | [0.62; 0.71] | 0.62*** | 0.03 |
| Self-rated health: partner | 1.05    | [0.99; 1.12] | 1.07*   | [1.01; 1.14] | 1.06    | 0.03 |
| Mortality: partner         | 1.34**  | [1.12; 1.61] | 0.92    | [0.79; 1.08] | 1.38*** | 0.07 |

*Note.* \*\*\* $p \leq .001$ , \*\*  $p < .01$ , \*  $p < .05$ . Baseline year: 1=2008, 0=2006; Gender: 1=male, 0=female; Ethnicity: 1=Caucasian, 0=other; Same-sex couple: 1 = yes, 0 = no; Mortality (partner): 1 = deceased, 0 = alive. Models 1 and 2 were estimated using the robust sandwich variance estimators in the *survival* package (Therneau, 2015) in R. Model 3 is a frailty model with a penalized likelihood estimation (Therneau, Grambsch, & Pankratz, 2003) estimated with the *frailtypack* package in R (Rondeau, Mazroui, & Gonzalez, 2012).



Table S5

*Multilevel structural equation model testing sequential mediation via partner and actor physical activity*

| Predictor                                 | DV: partner           | DV: actor             | DV: actor       |
|-------------------------------------------|-----------------------|-----------------------|-----------------|
|                                           | physical activity     | physical activity     | mortality       |
|                                           | <i>b</i> ( <i>p</i> ) | <i>b</i> ( <i>p</i> ) | HR ( <i>p</i> ) |
| <i>Model 1: without control variables</i> |                       |                       |                 |
| Life satisfaction: partner                | .08 (<.001)           | .03 (<.001)           | 0.96 (.003)     |
| Physical activity: partner                | -                     | .23 (<.001)           | 0.84 (<.001)    |
| Physical activity: actor                  | -                     | -                     | 0.64 (<.001)    |
| <i>Model 2: with control variables</i>    |                       |                       |                 |
| Life satisfaction: partner                | .03 (<.001)           | -.001 (.867)          | 0.96 (.004)     |
| Physical activity: partner                | -                     | .17 (<.001)           | 1.01 (.785)     |
| Physical activity: actor                  | -                     | -                     | 0.80 (<.001)    |
| Control variables                         |                       |                       |                 |
| Life satisfaction: actor                  | .003 (0.521)          | .03 (<.001)           | 0.99 (.361)     |
| Baseline year                             | .11 (<.001)           | .11 (<.001)           | 0.96 (.431)     |
| Gender: actor                             | -.29 (<.001)          | .32 (<.001)           | 2.06 (<.001)    |
| Age: actor                                | .001 (.666)           | -.01 (.002)           | 1.08 (<.001)    |
| Age: partner                              | -.004 (.031)          | .002 (.455)           | 1.01 (.372)     |
| Ethnicity: actor                          | .07 (.115)            | -.05 (.339)           | 0.94 (.695)     |
| Ethnicity: partner                        | -.07 (.175)           | .07 (.170)            | 1.10 (.566)     |
| Education: actor                          | .04 (<.001)           | .04 (.001)            | 0.96 (.108)     |
| Education: partner                        | .04 (<.001)           | .03 (.001)            | 1.02 (.541)     |
| Household income                          | .04 (.003)            | .03 (.002)            | 0.96 (.232)     |
| Same-sex couple                           | .11 (.547)            | .07 (.527)            | 2.84 (.009)     |
| Morbidity: actor                          | -.02 (.041)           | -.06 (<.001)          | 1.11 (<.001)    |
| Morbidity: partner                        | -.06 (<.001)          | -.01 (.569)           | 1.00 (.906)     |
| Self-rated health: actor                  | .02 (.060)            | .24 (<.001)           | 0.67 (<.001)    |
| Self-rated health: partner                | .23 (<.001)           | -.02 (.082)           | 1.05 (.136)     |
| Mortality: partner                        | -                     | -                     | 1.38 (<.001)    |

*Note.* Baseline year: 1=2008, 0=2006; Gender: 1=male, 0=female; Ethnicity: 1=Caucasian, 0=other; Same-sex couple: 1 = yes, 0 = no; Mortality (partner) was not included as a predictor of partner and actor physical activity as partner death (IV) could only occur after the measures of physical activity were collected (DVs).

Figure S1

*Multilevel structural equation model testing sequential mediation via partner and actor physical activity (without the control variables, see Model 1 in Table S5)*

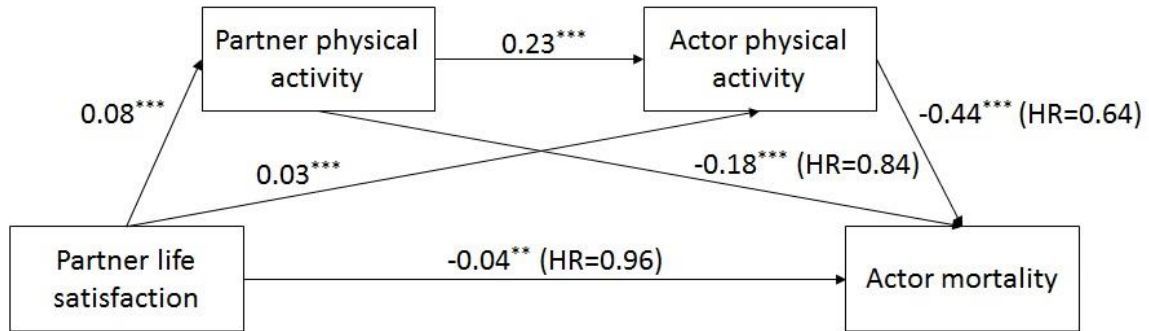

*Note.* \*\*\*  $p < .001$ , \*\*  $p < .01$ .  $N = 8,416$ .

Indirect effect „Partner life satisfaction -> Partner physical activity -> Actor physical activity -> Actor mortality”: -0.008, 95% CI [-0.01; -0.006].

Displayed coefficients are unstandardized path coefficients (for Cox regression: HR in brackets).

The model includes random intercepts of partner physical activity, actor physical activity and actor mortality.

Figure S2

*Multilevel structural equation model testing sequential mediation via partner and actor physical activity (with the control variables, see Model 2 in Table S5)*

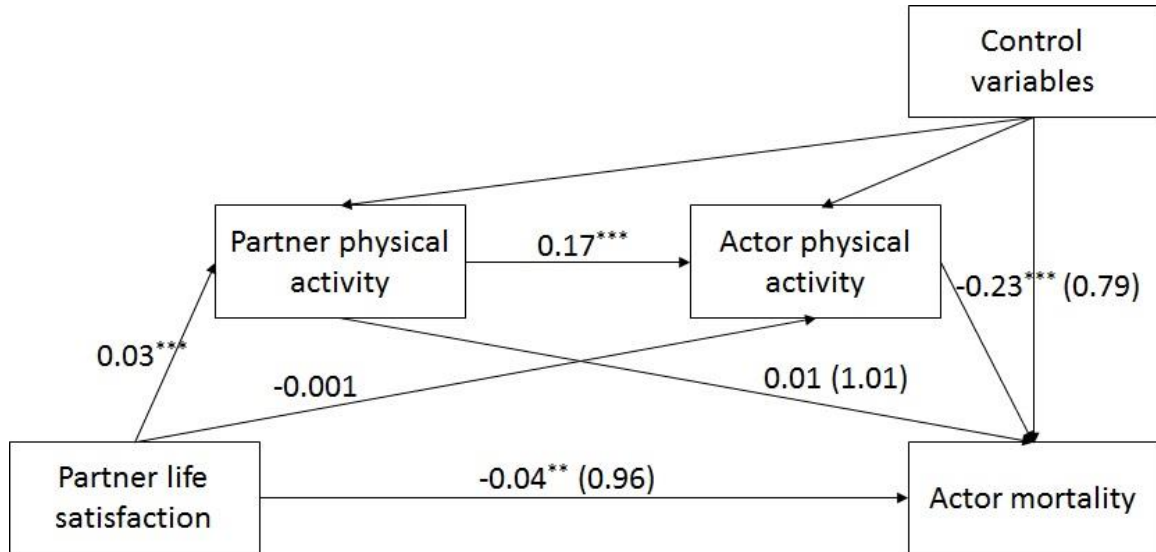

Note. \*\*\*  $p < .001$ , \*\*  $p < .01$ .  $N = 8,416$ .

Indirect effect „Partner life satisfaction -> Partner physical activity -> Actor physical activity -> Actor mortality”: -0.001, 95% CI [-0.02; -0.0006].

Displayed coefficients are unstandardized path coefficients (for Cox regression: HR in brackets).

The model includes random intercepts of partner physical activity, actor physical activity and actor mortality.

### **Perceived partner support scale**

(items' origin: Turner, Frankel and Levin 1983)

We would now like to ask you some questions about your partner or spouse. Please mark the answer which best shows how you feel about each statement.

1. How much do they really understand the way you feel about things?
2. How much can you rely on them if you have a serious problem?
3. How much can you open up to them if you need to talk about your worries?
4. How often do they make too many demands on you?
5. How much do they criticize you?
6. How much do they let you down when you are counting on them?
7. How much do they get on your nerves?

## References

- Rondeau, V., Mazroui, Y., & Gonzalez, J. R. (2012). frailtypack: An R Package for the Analysis of Correlated Survival Data with Frailty Models Using Penalized Likelihood Estimation or Parametrical Estimation. *Journal of Statistical Software*, 47(4), 1-28. URL <http://www.jstatsoft.org/v47/i04/>. .
- Therneau, T. M. (2015). A Package for Survival Analysis in S. version 2.38, <https://CRAN.R-project.org/package=survival>.
- Therneau, T. M., Grambsch, P. M., & Pankratz, V. S. (2003). Penalized Survival Models and Frailty. *Journal of Computational and Graphical Statistics*, 12(1), 156-175.
- Turner, R. J., G. Frankel, and D. M. Levin. 1983. "Social support: Conceptualization, measurement, and implications for mental health." Pp. 67-111 in *Research in Community and Mental Health*, edited by J.R. Greenley and R.G. Simmons. Greenwich: JAI Press.
